# Supplementary material
Source: PubMed Central journal article supplement (PMC4648551)

## Supplementary Online Content

Lewis KH, Zhang F, Arterburn DE, Ross-Degnan D, Gillman MW, Wharam JF. Comparing medical costs and use after laparoscopic adjustable gastric banding and Roux-en-Y gastric bypass. *JAMA Surg*. Published online June 3, 2015. doi:10.1001/jamasurg.2015.1081.

**eTable 1.** Size of Surgical Groups During Postoperative Observation Period

**eTable 2.** Sensitivity Analysis: Within and Between Procedure Changes for Utilization Outcomes – Pre- to Post-surgery for 7170 Propensity-Score Matched Individuals With at Least 2 Years of Preoperative Enrollment Data

**eFigure.** Flow Diagram of Cohort Selection and Inclusion Criteria

This supplementary material has been provided by the authors to give readers additional information about their work.

**eTable 1.** Size of Surgical Groups During Postoperative Observation Period

| Procedure Type | Number Remaining Enrolled by Post-Operative Year<br>(n (% of total cohort remaining)) |                       |                       |                       |                       |                 |
|----------------|---------------------------------------------------------------------------------------|-----------------------|-----------------------|-----------------------|-----------------------|-----------------|
|                | 1 year*                                                                               | 2 years               | 3 years               | 4 years               | 5 years               | 6 years         |
| AGB            | 4935                                                                                  | 3272                  | 1993                  | 1120                  | 572                   | 184             |
| RYGB           | 4935                                                                                  | 3018                  | 1770                  | 984                   | 518                   | 267             |
| <b>Total</b>   | <b>9870<br/>(100%)**</b>                                                              | <b>6290<br/>(64%)</b> | <b>3763<br/>(38%)</b> | <b>2104<br/>(21%)</b> | <b>1090<br/>(11%)</b> | <b>448 (5%)</b> |

\* Time denotes people remaining at the end of the year – e.g. “1 year” means “n” with a full post-operative year. \*\*percent of original cohort remaining at each time point.

**eTable 2.** Sensitivity Analysis: Within and Between Procedure Changes for Utilization Outcomes – Pre- to Post-surgery for 7170 Propensity-Score Matched Individuals With at Least 2 Years of Preoperative Enrollment Data

|                                | AGB                            |                                | RYGB                            |                                | AGB relative to RYGB            |                                |
|--------------------------------|--------------------------------|--------------------------------|---------------------------------|--------------------------------|---------------------------------|--------------------------------|
|                                | Level Change*                  | Trend Change*                  | Level Change*                   | Trend Change*                  | Level Change**                  | Trend Change**                 |
| <b>Quarterly ER Visits</b>     | 0.001<br>(-0.20, 0.20)         | <b>-0.05</b><br>(-0.08, -0.02) | <b>+0.29</b><br>(0.11, 0.46)    | <b>-0.05</b><br>(-0.07, -0.02) | <b>-0.35</b><br>(-0.59, -0.12)  | -0.01<br>(-0.04, 0.02)         |
| <b>Quarterly Hospital Days</b> | 0.12<br>(-0.13, 0.37)          | - 0.01<br>(-0.04, 0.02)        | <b>+0.46</b><br>(0.18, 0.75)    | -0.04<br>(-0.09, 0.01)         | <b>-0.37</b><br>(-0.73, -0.005) | 0.005<br>(-0.05, 0.04)         |
| <b>Prescription Drug Costs</b> | <b>-0.28</b><br>(-0.32, -0.23) | <b>-0.10</b><br>(-0.11, -0.09) | <b>- 0.50</b><br>(-0.56, -0.45) | <b>-0.07</b><br>(-0.08, -0.05) | <b>0.23</b><br>(0.15, 0.30)     | <b>-0.04</b><br>(-0.06, -0.03) |
| <b>Total Health Care Costs</b> | <b>-0.11</b><br>(-0.18, -0.05) | <b>-0.07</b><br>(-0.08, -0.06) | <b>-0.13</b><br>(- 0.20, -0.06) | <b>-0.04</b><br>(-0.05, -0.03) | 0.02<br>(-0.07, 0.11)           | <b>-0.03</b><br>(-0.04, -0.01) |

\*cells include parameter estimates and 95% CI's, parameter estimates for within procedure pre-post comparisons are simple rate ratios; \*\*interaction term parameter estimates and 95% CI's are reported to compare level and trend changes between procedures, parameter estimates for between procedure comparisons are ratios of rate ratios.

**eFigure.** Flow Diagram of Cohort Selection and Inclusion Criteria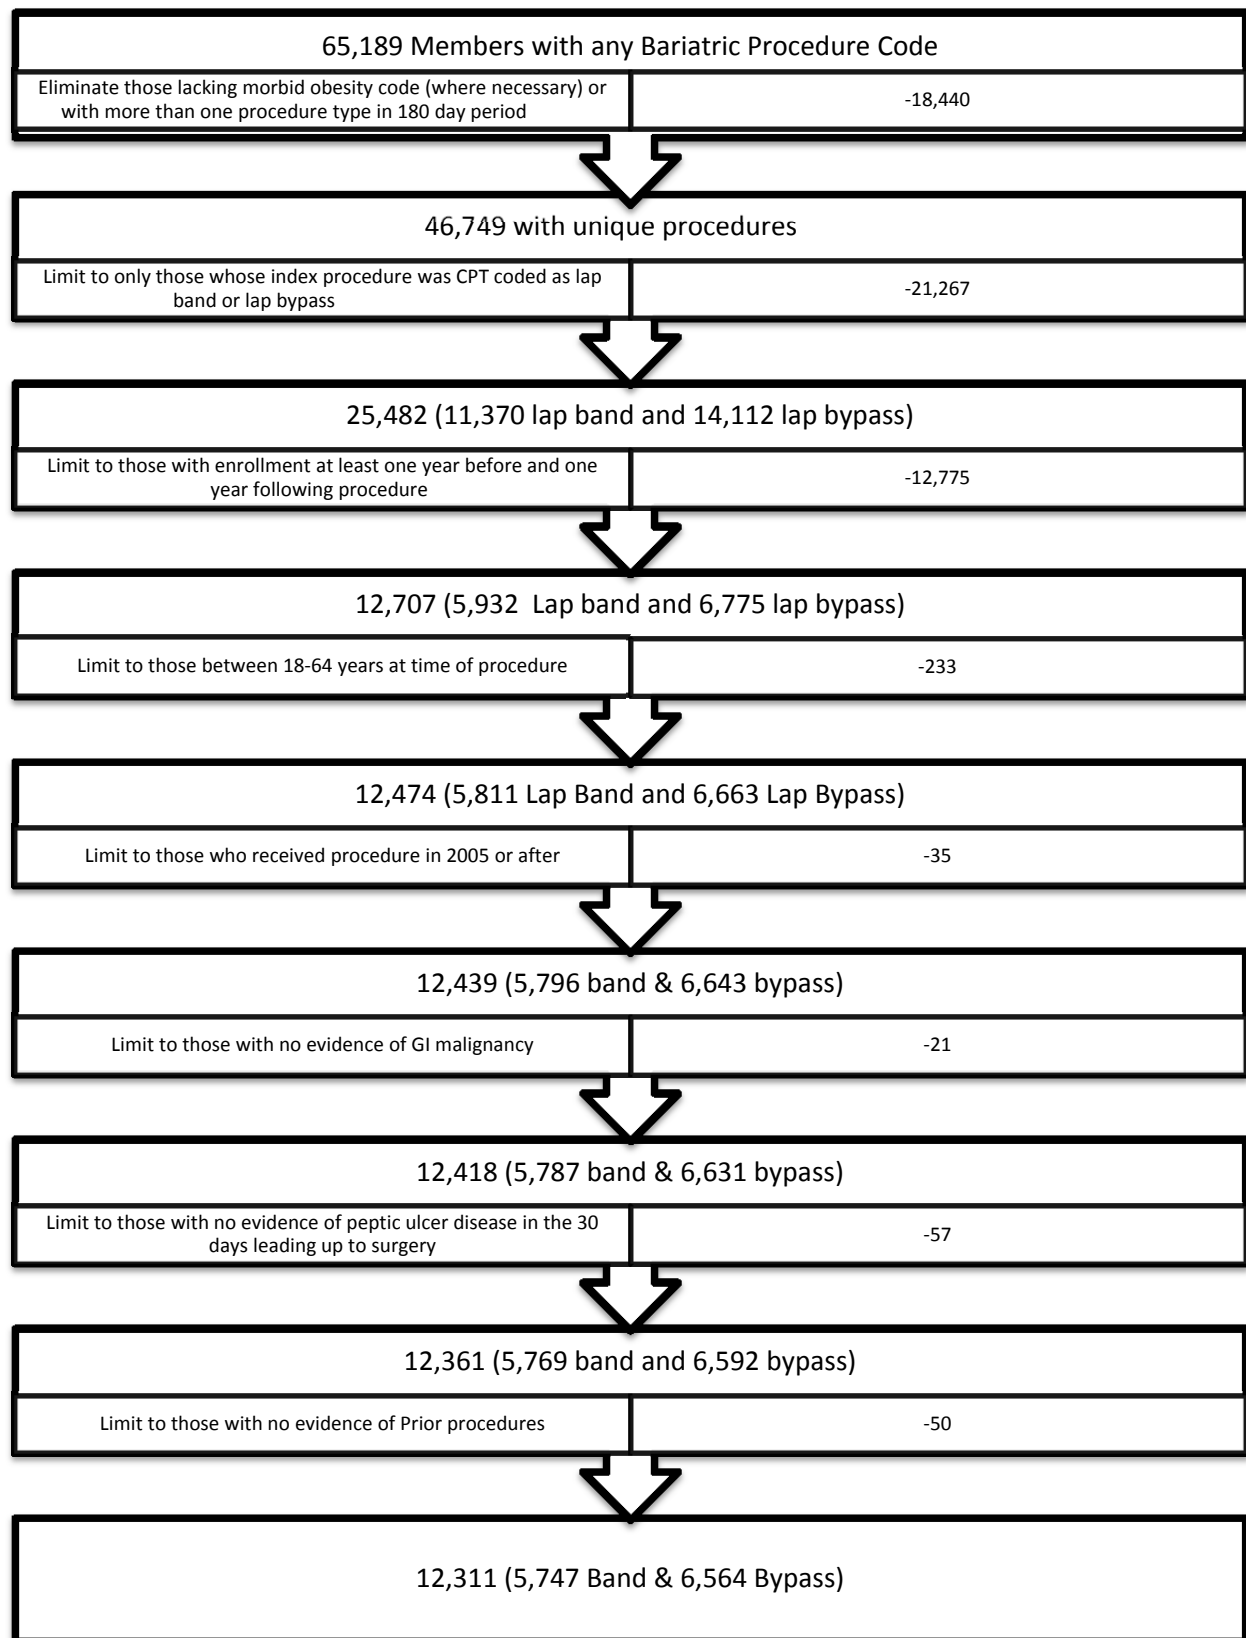

Supplement: NIHMS729831-supplement-Supplemental_Materials.pdf [file NIHMS729831-supplement-Supplemental_Materials.pdf]
